# Supplementary material for: Practical Zn anodes enabled by a Ti-MOF-derived coating for aqueous batteries
Source: Royal Society of Chemistry journal article supplement (doi:10.1039/d2ta02711a), 2022-01-01
Supplement: d2ta02711a1.pdf [file d2ta02711a1.pdf]

## Supporting information

### **Practical Zn anodes enabled by a Ti-MOF-derived coating for aqueous batteries**

Qiuju Xu<sup>a</sup>, Wencai Zhou<sup>b</sup>, Tuo Xin<sup>a</sup>, Zilong Zheng<sup>b</sup>, Xiangcheng Yuan<sup>a</sup>, Jinzhang  
Liu<sup>a,\*</sup>

<sup>a</sup> School of Materials Science and Engineering, Beihang University, Beijing, China

\*E-mail: [ljz78@buaa.edu.cn](mailto:ljz78@buaa.edu.cn)

<sup>b</sup> Department of Materials and Manufacturing, Beijing University of Technology,  
Beijing 100124, China

## **Experimental Section**

### **Electropolymerization of poly(1,5-naphthalenediamine)**

The polymer cathode was prepared by electrodepositing poly(1,5-naphthalenediamine) onto a coating of nanoporous activated carbon (AC). First, a slurry was made by dispersing AC power (YP-80, Kuraray Co.), carbon black, and polyvinylidene difluoride as binder at a weight ratio of 8:1:1 into N-methyl pyrrolidone. The slurry was coated onto a 3 mm-thick carbon fiber felt, followed by a drying process. The mass loading of AC coating is  $\sim 31 \text{ mg cm}^{-2}$ . Second, the AC-coated carbon felt was used as work electrode in a three-electrode cell containing 1 M  $\text{H}_2\text{SO}_4$  solution and 0.02 M 1,5-NAPD molecules. With a Pt foil as counter electrode and an Ag/AgCl reference electrode, the electropolymerization was conducted by running cyclic voltammogram (CV) cycles at  $20 \text{ mV s}^{-1}$  within the voltage range from  $-0.4$  to  $1.0 \text{ V}$  for 300 cycles. Third, the poly(1,5-NAPD)/AC was rinsed with deionized water and dried overnight.

### **Electrochemical measurements**

An electrochemical workstation (CorrTest CS 310) was used in this experiment. The linear polarization was tested at a voltage sweep rate of  $0.5 \text{ mV s}^{-1}$  within the voltage range from  $-1.08$  to  $-0.88 \text{ V}$ . A Zn foil as counter electrode and an Ag/AgCl reference electrode were used, and the electrolyte was 3 M  $\text{ZnSO}_4$  aqueous solution. The linear sweep voltammetry (LSV) was measured in a 3 M  $\text{ZnSO}_4$  aqueous electrolyte at a voltage sweep rate of  $0.1 \text{ mV s}^{-1}$ . Hydrogen gas evolution would be occurred when the potential is below  $-1.05 \text{ V}$ . The cycling performance of the  $\text{MnO}_2$ -based full cells was measured by the battery test system (LAND CT3001A) in the voltage range of  $0.9 - 1.9 \text{ V}$ . Electrochemical impedance spectroscopy (EIS) of the cells were conducted on the electrochemical workstation over the frequency range  $100 \text{ kHz} - 0.01 \text{ Hz}$ .

### **Density function theory simulation**

All the calculations were performed with density function theory (DFT) as implemented in CP2K/*Quickstep* package,<sup>1</sup> while method D3 developed by Grimme et al.<sup>2</sup> includes the dispersion correction and adds van der Waals interaction to the conventional Kohn-

Sham potential energy. The function of the standard Perdew-Bueke-Ernzerhof (PBE) generalized gradient approximation (GGA),<sup>3</sup> was employed for exchange correction interactions, within the framework of Gaussian and plan wave (GPW) method.<sup>4</sup> The wave functions of the valence electrons were expanded in terms of Gaussian functions with molecularly optimized (MOLOPT) double  $\zeta$  polarized basis sets (m-DZVP),<sup>5</sup> which ensures a small basis set superposition error (BSSE) in gas and condensed phase, and core electrons were described with norm-conserving Goedecker-Teter-Hutter (GTH) pseudopotentials.<sup>6</sup> The energy cutoff for the plane-wave was set at 500 Ry. All the atoms are allowed to relax until the force on each atom is less than 0.01 eV/Å.

### Structural characterizations

Fig. S1 shows FESEM images of as-prepared Ti-MOF. Each Ti-MOF granule is regularly shaped, with width of  $\sim 800$  nm and thickness of 400 nm. Fig. S2 shows a XRD pattern of the Ti-MOF product.

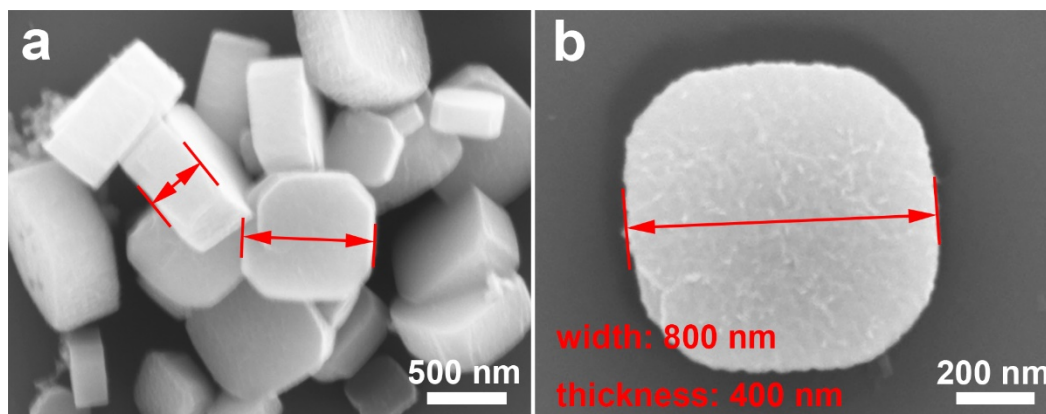

**Fig. S1** (a) Low- and (b) high-magnification FESEM images of the Ti-MOF precursor.

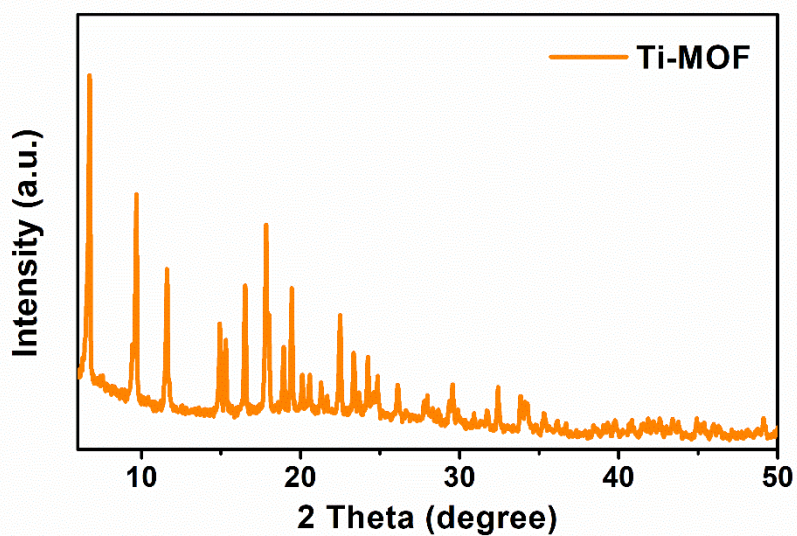

**Fig. S2** XRD pattern of the Ti-MOF precursor.

The Ti-MOF was converted into  $\text{TiO}_2/\text{NC}$  after being calcined in Ar. A FESEM image of the  $\text{TiO}_2/\text{NC}$  granules is shown in Fig. S3a. Correspondingly, EDS elemental mappings for Ti, O, C, and N distributions over the  $\text{TiO}_2/\text{NC}$  granules are shown in Fig. S3b.

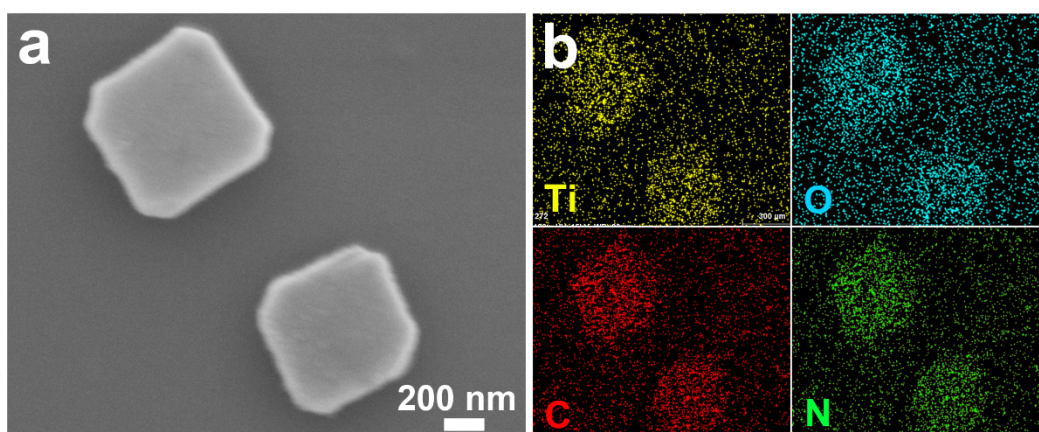

**Fig. S3** (a) FESEM image and (b) corresponding element mappings of  $\text{TiO}_2@\text{NC}$  granules.

The  $\text{TiO}_2$  sample was obtained by calcining Ti-MOF in air. Our XRD analysis confirms the anatase  $\text{TiO}_2$ , as shown in Fig. S4a. A FESEM image of this  $\text{TiO}_2$  product is shown in Fig. S4b. Although the carbon was burned out,  $\text{TiO}_2$  nanoparticles were inter-connected and the original shape of Ti-MOF was maintained. The NC product was also obtained by etching away  $\text{TiO}_2$  in the  $\text{TiO}_2/\text{NC}$  product using HCl solution. The XRD pattern in Fig. S4c shows a broad peak of graphitic carbon, and no any peak from  $\text{TiO}_2$ . Also, the NC granules maintain the original cubic shaped of Ti-MOF, as shown in Fig. S4d.

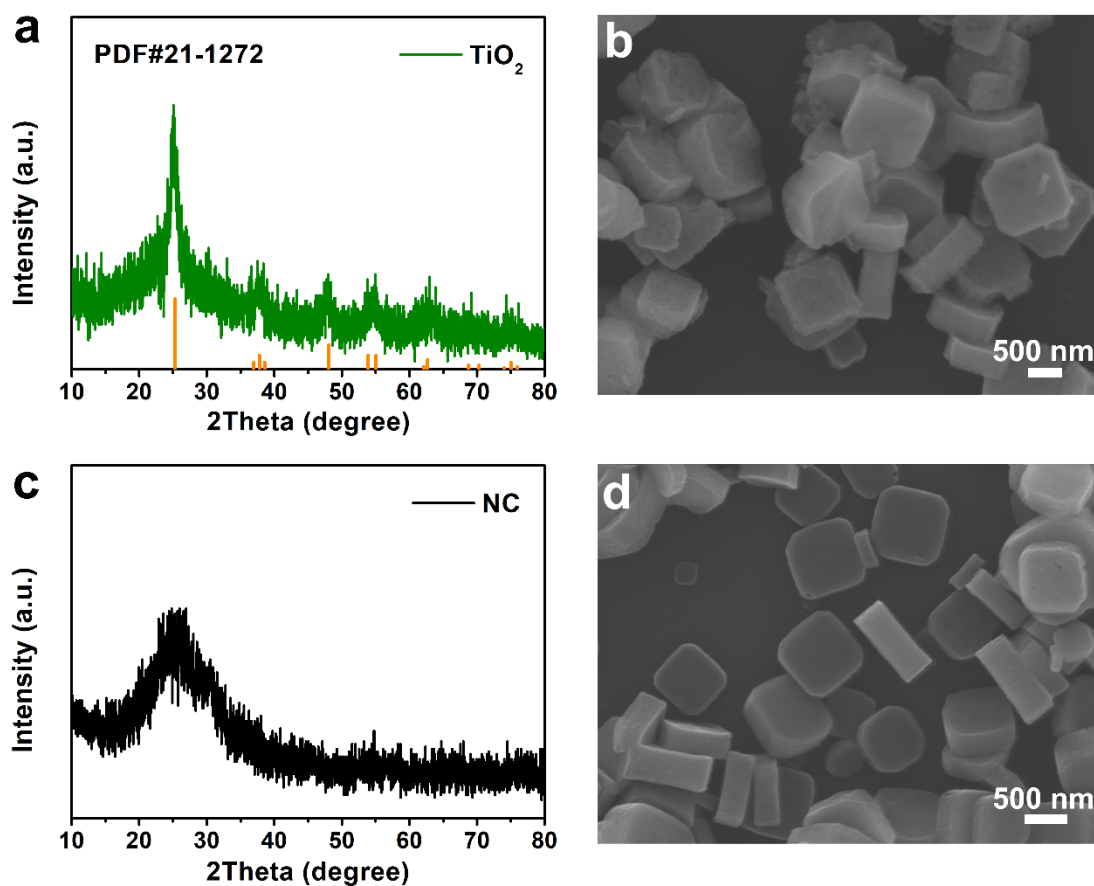

**Fig. S4** (a) XRD pattern and (b) FESEM image of anatase  $\text{TiO}_2$  derived from Ti-MOF. (c) XRD and (d) FESEM image of the NC product made by etching away  $\text{TiO}_2$  in  $\text{TiO}_2/\text{NC}$  composite.

Fig. S5 shows a survey XPS spectrum of the TiO<sub>2</sub>/NC product.

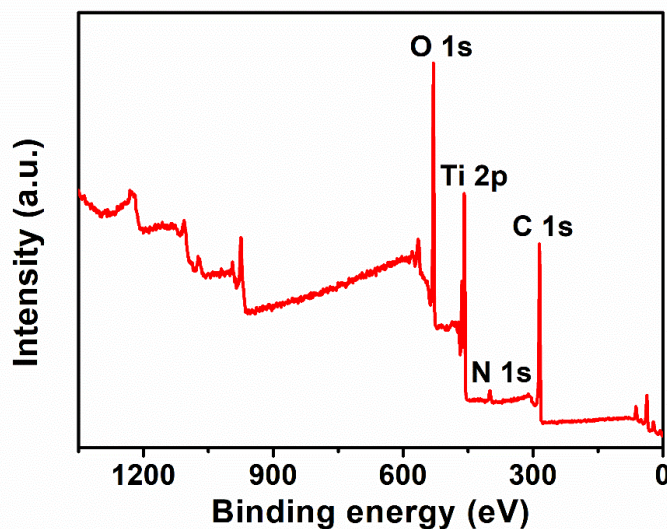

Fig. S5 Survey XPS spectrum of the TiO<sub>2</sub>/NC composite.

### BET measurement of the TiO<sub>2</sub>/NC composite

Fig. S6 shows the BET measurement result of the TiO<sub>2</sub>/NC samples. According to the N<sub>2</sub> adsorption-desorption isotherm in Fig. S6a, the specific surface area of TiO<sub>2</sub>/NC composite is determined to be 138 m<sup>2</sup> g<sup>-1</sup>. The pore size distribution of this this sample is shown in Fig. S6b.

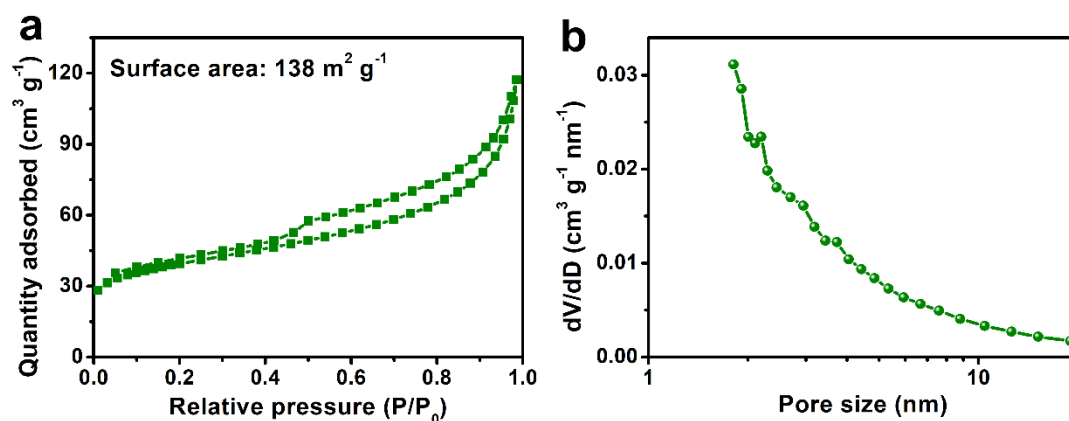

Fig. S6 BET measurement result of the TiO<sub>2</sub>/NC product. (a) N<sub>2</sub> adsorption/desorption curves at room temperature. (b) BJH pore size distribution.



## Wettability tests on NC and TiO<sub>2</sub>/NC coatings

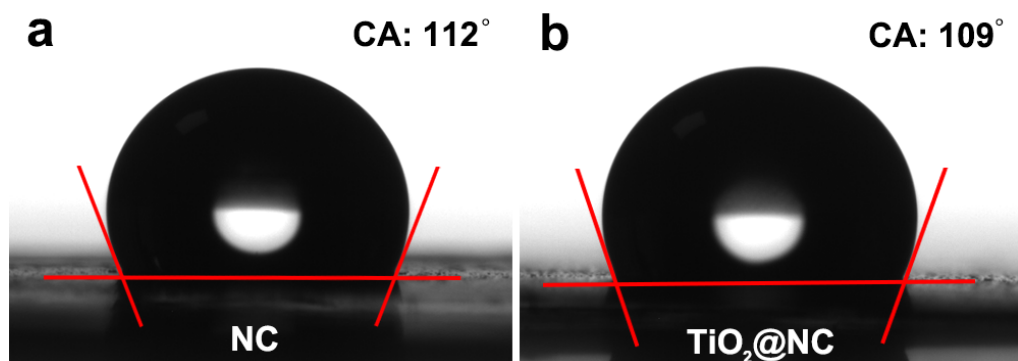

**Fig. S7** Contact angle of (a) the NC coating and (b) the TiO<sub>2</sub>/NC coating.

## Anti-corrosion performance

A bare Zn foil and a Zn@TiO<sub>2</sub>/NC disk were kept in two vials containing 3 M ZnSO<sub>4</sub> solution, respectively, as shown in Fig. S8a. After being immersed for one week, the originally shiny Zn foil presented white color products due to corrosion, while the black Zn@TiO<sub>2</sub>/NC remained unchanged in appearance, as shown in Fig. S8c. Our XRD analysis revealed that the byproduct over corroded bare Zn is ZnSO<sub>4</sub>(OH)<sub>6</sub>·xH<sub>2</sub>O, and the Zn@TiO<sub>2</sub>/NC sample after 1-week immersion in ZnSO<sub>4</sub> solution was almost free of this byproduct, as shown in Fig. S8b.

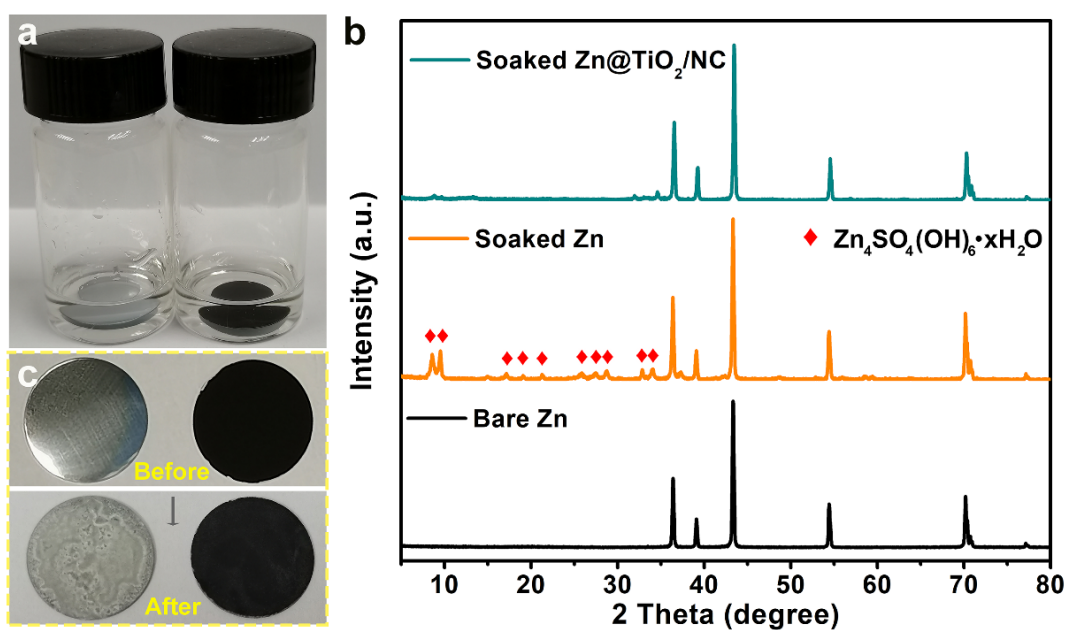

**Fig. S8** (a) Optical photographs of a bare Zn disk and a Zn@TiO<sub>2</sub>/NC disk immersed

in 3M ZnSO<sub>4</sub> electrolyte for 7 days. (b) XRD patterns of the bare Zn and the Zn@TiO<sub>2</sub>/NC foil before and after the natural corrosion process in ZnSO<sub>4</sub>. (c) Optical photographs of a bare Zn disk and a Zn@TiO<sub>2</sub>/NC disk before and after the natural corrosion test.

### Electrochemical tests

Two symmetric pouch cells using bare Zn and Zn@TiO<sub>2</sub>/NC, respectively, were cycled at identical current density, and the results are shown in Fig. S9.

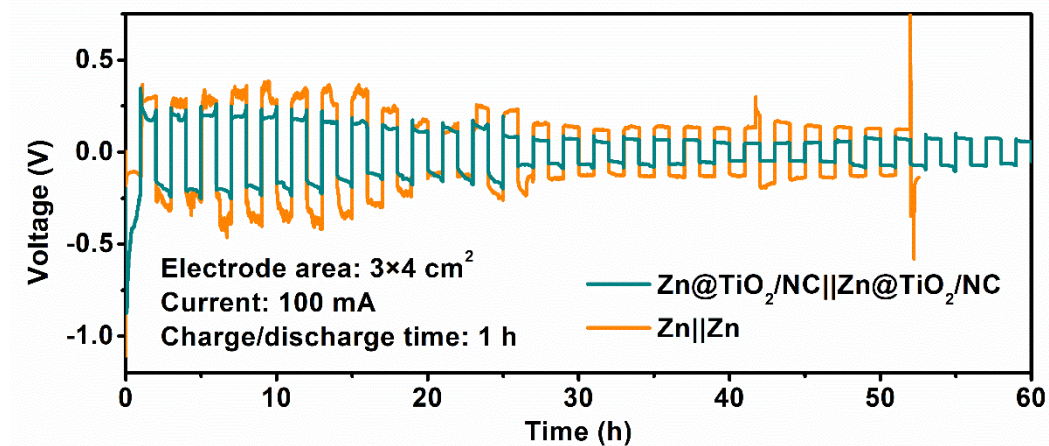

**Fig. S9** Cycling performance of symmetric pouch cells using bare Zn and Zn@TiO<sub>2</sub>/NC, respectively.

In order to demonstrate the efficacy of Zn@TiO<sub>2</sub>/NC in suppressing hydrogen gas evolution, a high-capacity poly(1,5-NAPD)/AC cathode based on carbon fiber felt was made. The thickness of carbon fiber felt is 3 mm and the mass loading of poly(1,5-NAPD)/AC is over 30 mg cm<sup>-2</sup>, which can provide a high areal capacity over 5 mAh cm<sup>-2</sup>. Thus the opposite cathode can be stripped/plated at a high current and with large depth beyond 10 μm. Generally, the rate of H<sub>2</sub> generation is related to the areal current density of the anode. Hence, suppression of H<sub>2</sub> generation at a high charge-discharge



current is critical for a practical ZIB. In our experiment, a beaker-based full cell was used to observe the  $H_2$  evolution over bare Zn or  $Zn@TiO_2/NC$  surfaces when charged/discharged at  $20\text{ mA cm}^{-2}$ . As shown in Fig. S10a and b, with prolonging the cycling time, more and more bubbles were emerged over the bare Zn anode. However, for the  $Zn@TiO_2/NC$  anode, it was nearly free of bubbles after being cycled for 10 cycles (Fig. S10a). After 20 cycles, a few bubbles were emerged near the top edge of the anode, presumably the current near the electrolyte surface is higher.

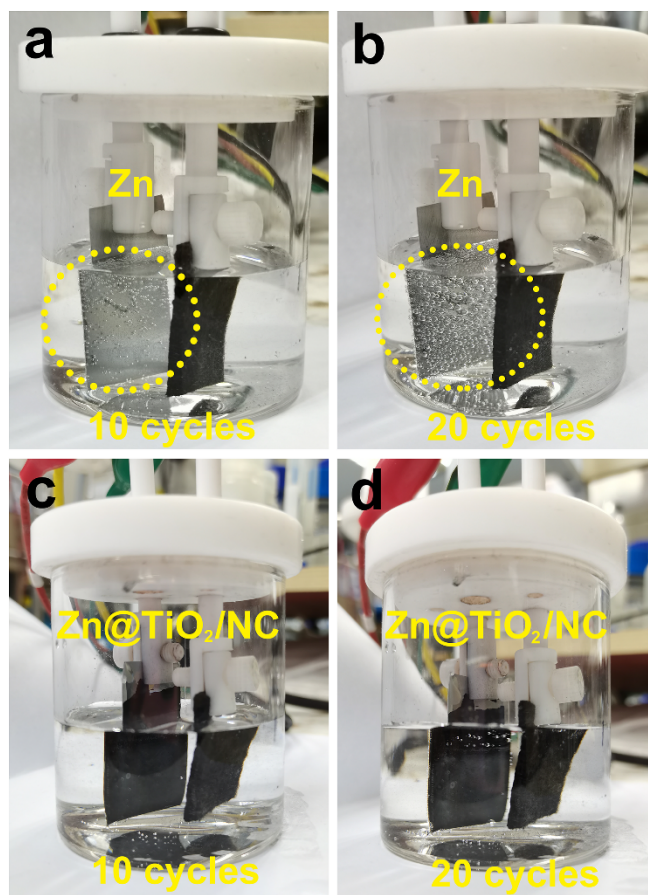

**Fig. S10** Beaker-based full cells using a high-capacity poly(1,5-NAPD)/AC cathode to observe the  $H_2$  evolution behaviors of the bare Zn and the  $Zn@TiO_2/NC$  by running charged/discharged cycles at  $20\text{ mA cm}^{-2}$ .

Fig. S11 shows chronoamperometry (CA) curves of a bare Zn anode and a  $Zn@TiO_2/NC$  anode under constant voltage of  $-210\text{ mV}$ .

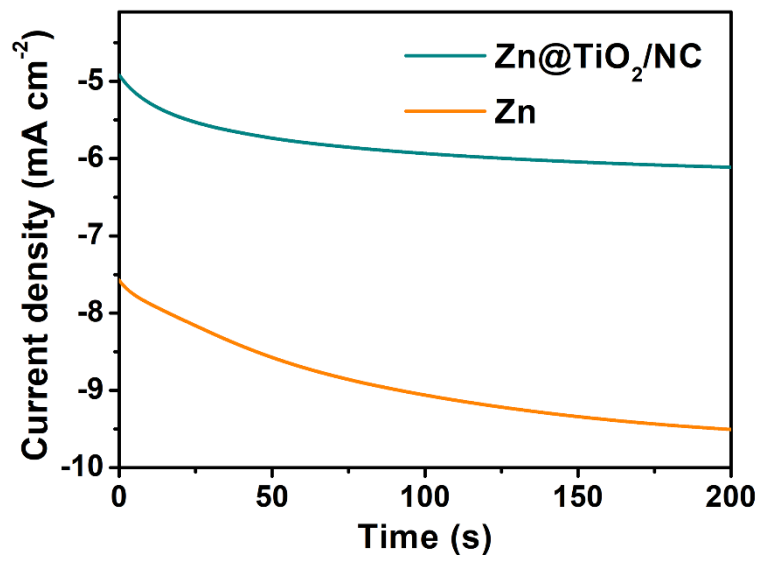

**Fig. S11** Chronoamperometry (CA) curves of a Zn@TiO<sub>2</sub>/NC anode and a bare Zn anode at constant potential of - 210 mV.

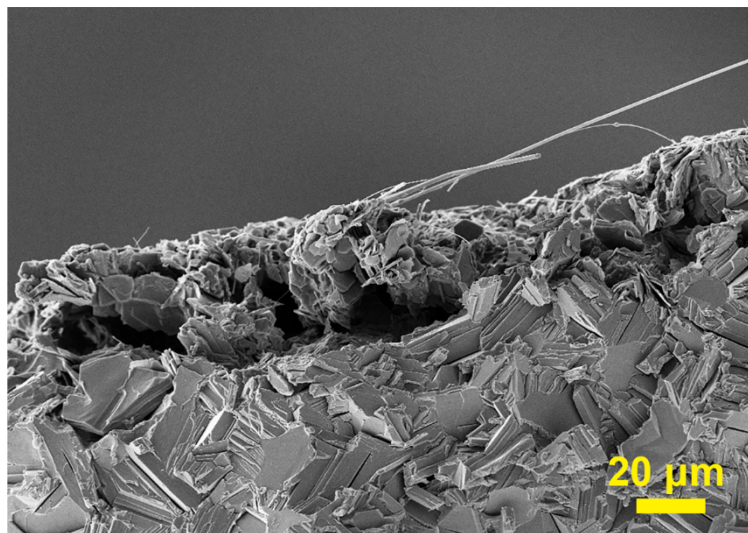

**Fig. S12** Cross-sectional FESEM image of a cycled bare Zn anode.

Half cells using Zn@NC and Zn@TiO<sub>2</sub> anodes, respectively to match with Ti were cycled at 2 mA cm<sup>-2</sup> with set capacity of 1 mAh cm<sup>-2</sup>, and the results are shown in Fig.

S13. For other two half cells using Zn@TiO<sub>2</sub>/NC and bare Zn anodes, respectively, their variations of Coulombic efficiency (CE) in the cycling process is shown in Fig. S14a. Also, voltage-capacity plots of the two cells tested at 5 mA cm<sup>-2</sup> with set capacity of 1 mAh cm<sup>-2</sup> are shown in Fig. S14b and c, respectively.

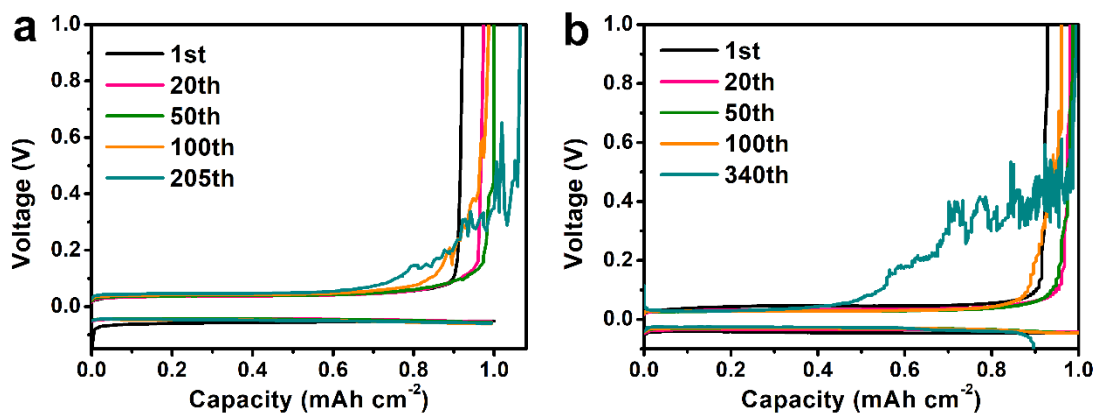

**Fig. S13** Charge/discharge curves for (a) Ti||Zn@NC and (b) Ti||Zn@TiO<sub>2</sub> asymmetric cells at current density of 2 mA cm<sup>-2</sup> and set capacity of 1 mAh cm<sup>-2</sup>.

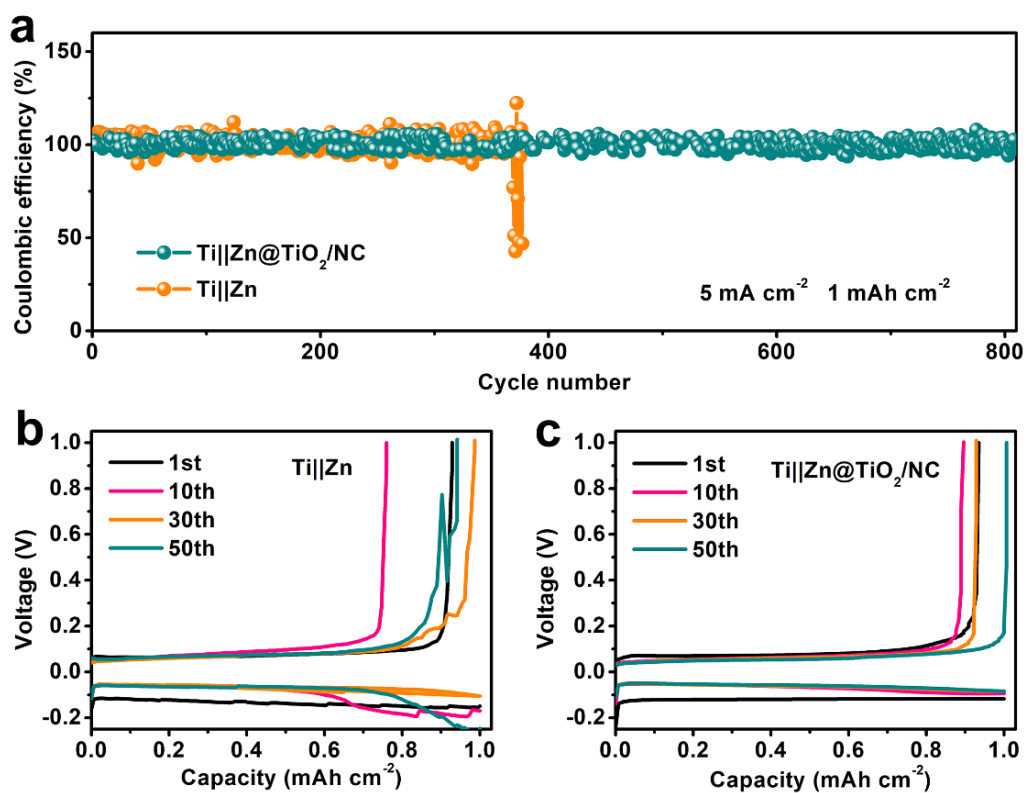

**Fig. S14** (a) Variations of CE values of a Ti||Zn and a Ti||Zn@TiO<sub>2</sub>/NC cell at current density of 5 mA cm<sup>-2</sup> and set capacity of 1 mAh cm<sup>-2</sup>. The charge/discharge curves of

(b) the Ti||Zn cell and (c) the Ti||Zn@TiO<sub>2</sub>/NC cell after different cycles.

Fig. S15 shows room-temperature EIS spectra of three symmetric cells using bare Zn, Zn@TiO<sub>2</sub>/NC, and Zn@TiO<sub>2</sub>, respectively. The  $R_{ct}$  values of the three anodes are in the sequence of Zn@TiO<sub>2</sub>/NC < Zn@TiO<sub>2</sub> < Zn.

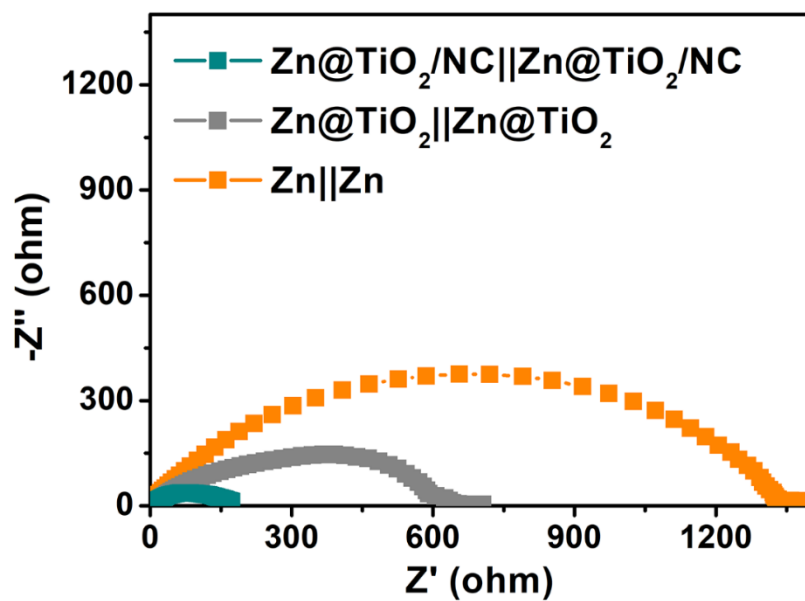

**Fig. S15** Room-temperature Nyquist plots of symmetric cells using bare Zn, Zn@TiO<sub>2</sub> and Zn@TiO<sub>2</sub>/NC anodes.

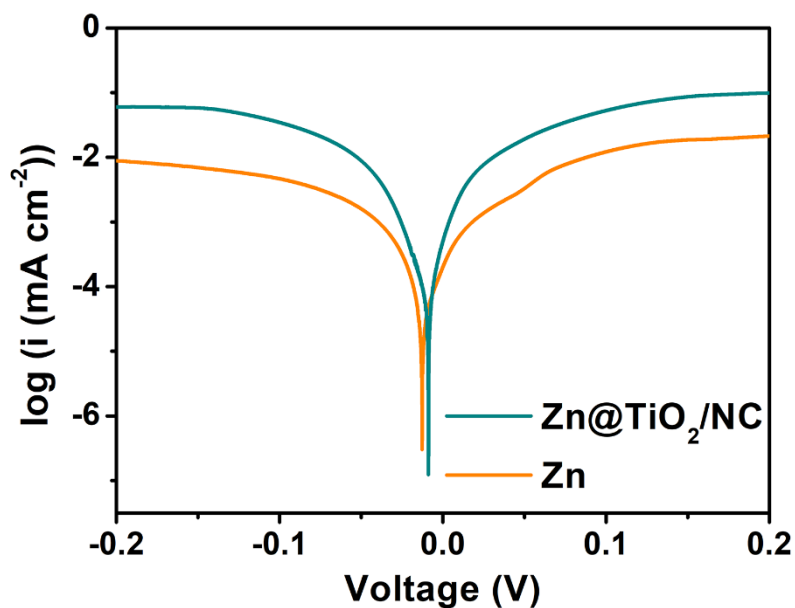

**Fig. S16** Linear polarization curves of symmetric cells using  $\text{Zn@TiO}_2/\text{NC}$  and bare Zn, respectively.

The consequence of  $\text{H}_2$  evolution could make the cell swell or even burst. Figure S17a and b show two symmetric cells using bare Zn and  $\text{Zn@TiO}_2/\text{NC}$ , respectively, after the cycling test.

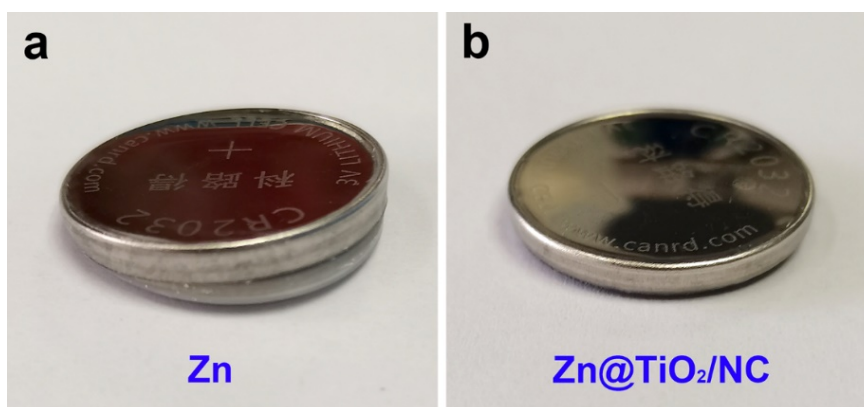

**Fig. S17** Optical photographs of (a) a  $\text{Zn}||\text{Zn}$  and (b) a  $\text{Zn@TiO}_2/\text{NC}||\text{Zn@TiO}_2/\text{NC}$  symmetric cell after being cycled.

Symmetric cells using Zn@TiO<sub>2</sub>/NC, Zn@TiO<sub>2</sub>, and bare Zn were further tested by running charge-discharge cycles at different current densities and capacities. Cycling performances of the two symmetric cells using bare Zn and Zn@TiO<sub>2</sub>/NC, respectively, tested at 0.5 mA cm<sup>-2</sup> and 0.25 mAh cm<sup>-2</sup>, are compared in Fig. S18. In Fig. S19, cycling stabilities of three cells using bare Zn, Zn@TiO<sub>2</sub>, and Zn@TiO<sub>2</sub>/NC, respectively, and tested at 2 mA cm<sup>-2</sup> and 1 mAh cm<sup>-2</sup>, were compared. For the cycling performances of cells tested at higher current, Fig. S20a shows the results of two cells using bare Zn and Zn@TiO<sub>2</sub>/NC, respectively, tested at 10 mA cm<sup>-2</sup> and 1 mAh cm<sup>-2</sup>. From the practical point of view, a high capacity of ZIB cathode helps increasing volumetric energy density, thus the metal anode is also required to offer a high areal capacity in operation. Hence, we tested the symmetric cell using Zn@TiO<sub>2</sub>/NC at 10 mA cm<sup>-2</sup> and 5 mAh cm<sup>-2</sup>, which means a fast charge/discharge rate and large depth of ~ 8.5 μm for Zn stripping/plating. As shown in Fig. S20b, the Zn@TiO<sub>2</sub>/NC anode could sustain 200 cycles even operated at 10 mA cm<sup>-2</sup> and 5 mAh cm<sup>-2</sup>.

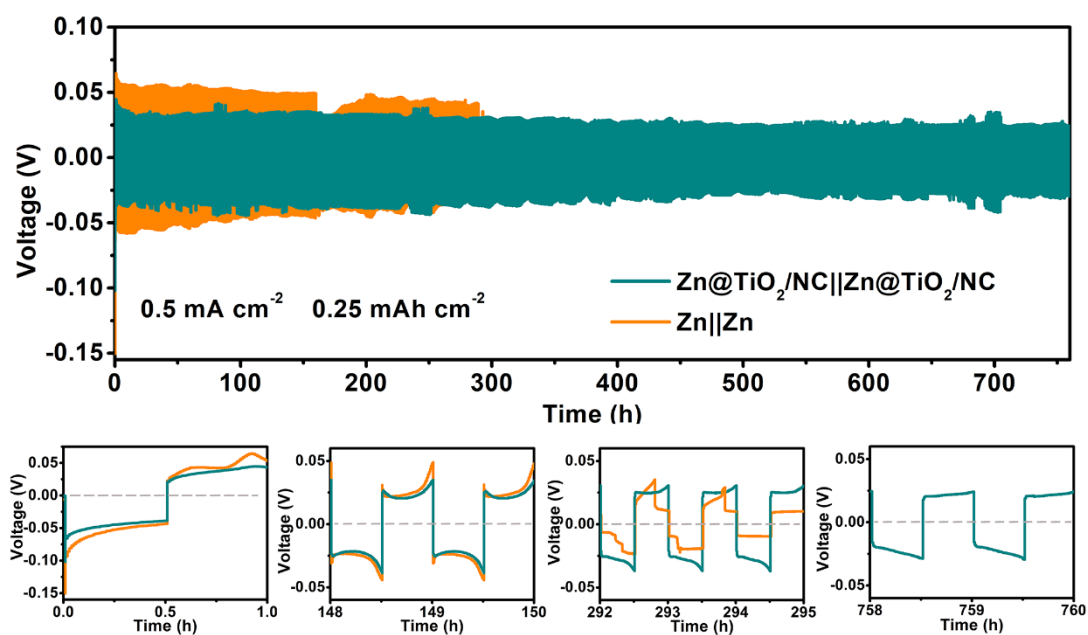

**Fig. S18** Cycling performances of symmetric cells using bare Zn and Zn@TiO<sub>2</sub>/NC, respectively, tested at 0.5 mA cm<sup>-2</sup> and set capacity of 0.25 mAh cm<sup>-2</sup>.



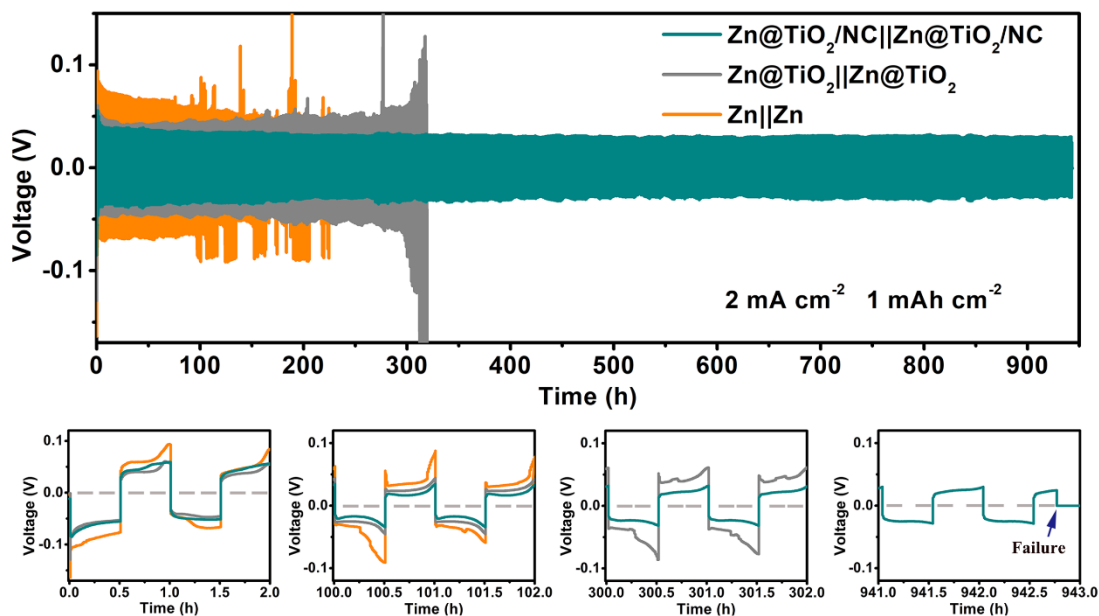

**Fig. S19** Cycling performances of symmetric cells using bare Zn, Zn@TiO<sub>2</sub>, and Zn@TiO<sub>2</sub>/NC, respectively, tested at 2 mA cm<sup>-2</sup> and set capacity of 1 mAh cm<sup>-2</sup>.

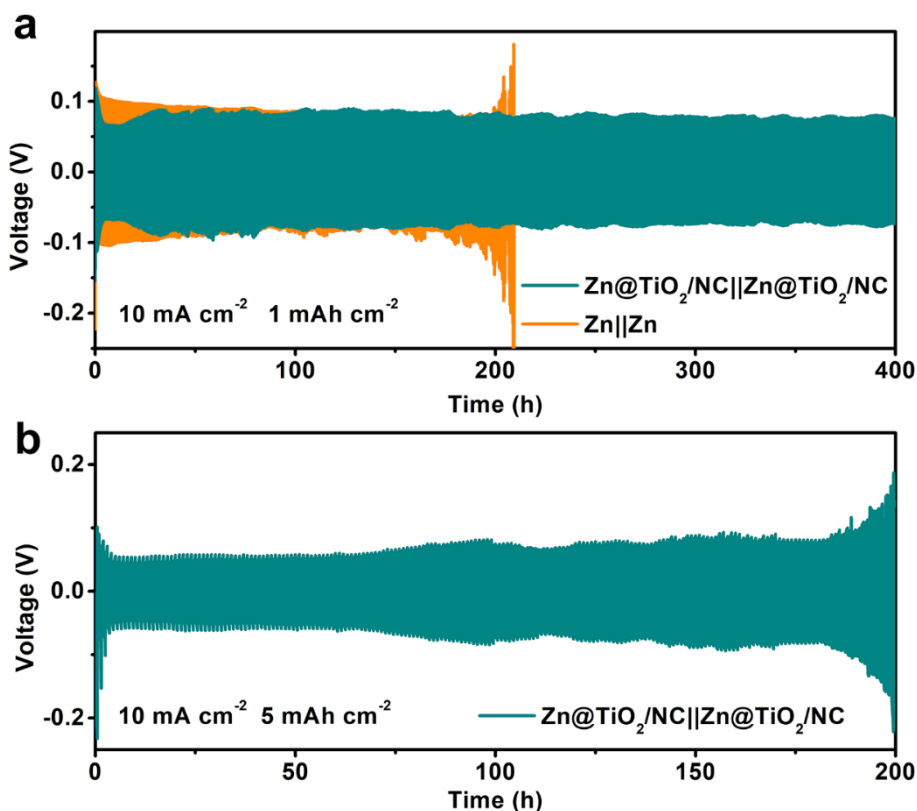

**Fig. S20** Cycling performance of (a) Zn||Zn and Zn@TiO<sub>2</sub>/NC||Zn@TiO<sub>2</sub>/NC symmetric cells at 10 mA cm<sup>-2</sup> and set capacity of 1 mAh cm<sup>-2</sup>, and (b) the Zn@TiO<sub>2</sub>/NC||Zn@TiO<sub>2</sub>/NC cell at 10 mA cm<sup>-2</sup> and set capacity of 5 mAh cm<sup>-2</sup>.

The two symmetric cells using bare Zn and Zn@TiO<sub>2</sub>/NC, respectively, were tested by recording the dependence of voltage on time while applying a constant current for electrodeposition. Fig. S21a-c show the voltage-time profiles of the two symmetric cells when applied constant current at 1, 2, and 5 mA cm<sup>-2</sup>, respectively. Apparently, the peak current of Zn@TiO<sub>2</sub>/NC is smaller than that of the bare Zn. Comparisons of their peak current values at 1, 2, and 5 mA cm<sup>-2</sup>, respectively, are shown in Fig. S21d.

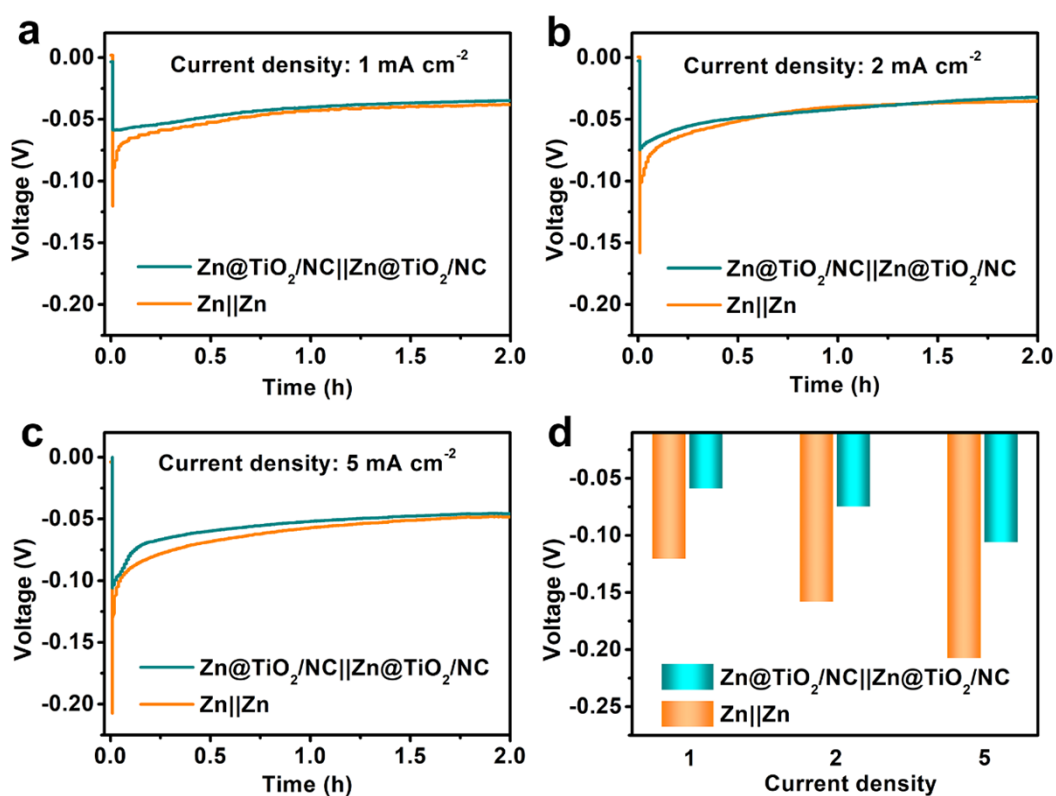

**Fig. S21** Voltage-time plots showing galvanostatic nucleation overpotentials of a Zn||Zn cell and a Zn@TiO<sub>2</sub>/NC||Zn@TiO<sub>2</sub>/NC cell tested at current densities of (a) 1, (b) 2, and (c) 5 mA cm<sup>-2</sup>. (d) Comparisons of peak potentials between the two cells.

Fig. S22 shows FESEM images of a bare Zn anode after being cycled at  $5 \text{ mA cm}^{-2}$  for 60 h. It can be seen that this Zn electrode was suffered from severe dendrite growth.

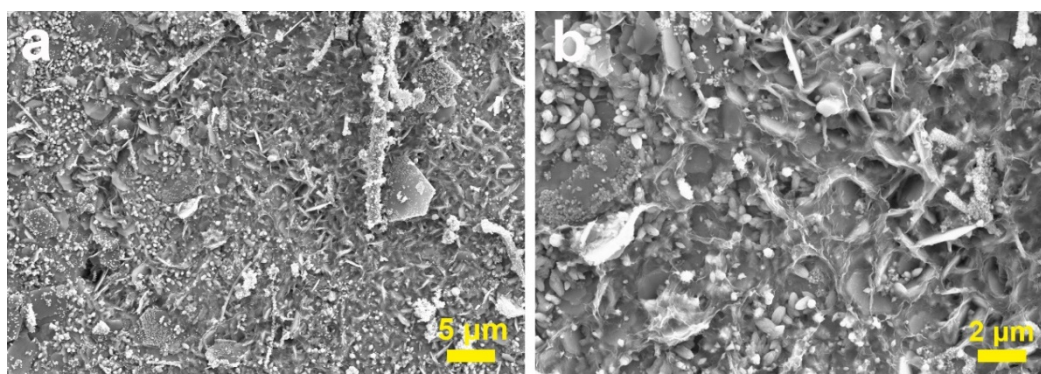

**Fig. S22** (a) low- and (b) high-magnification FESEM images showing the surface morphologies of the bare Zn after being cycled at  $5 \text{ mA cm}^{-2}$  and set capacity of  $1 \text{ mAh cm}^{-2}$  for 60 h.

The surface morphologies of  $\text{Zn@TiO}_2$  and  $\text{Zn@NC}$  after being cycled in symmetric cells are shown in Fig. S23.

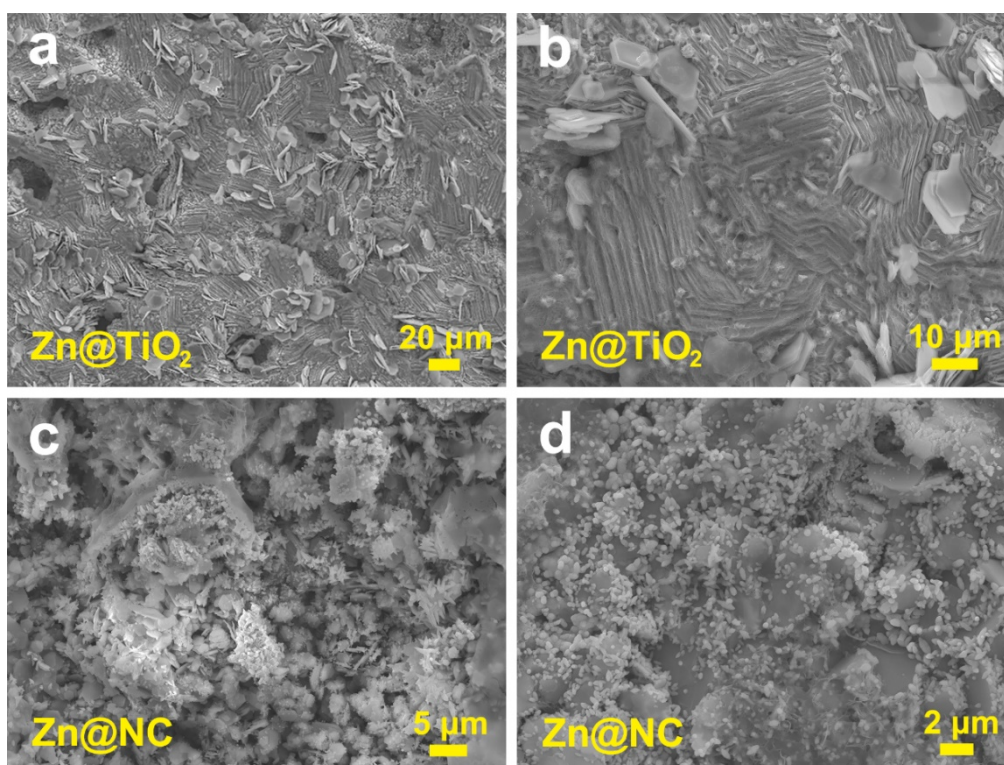

**Fig. S23** FESEM images showing surface morphologies of (a, b) the  $\text{Zn@TiO}_2$  and (c,

d) the Zn@NC in symmetric cells after the cycling test.

### Characterizations of $\alpha$ -MnO<sub>2</sub> cathode material

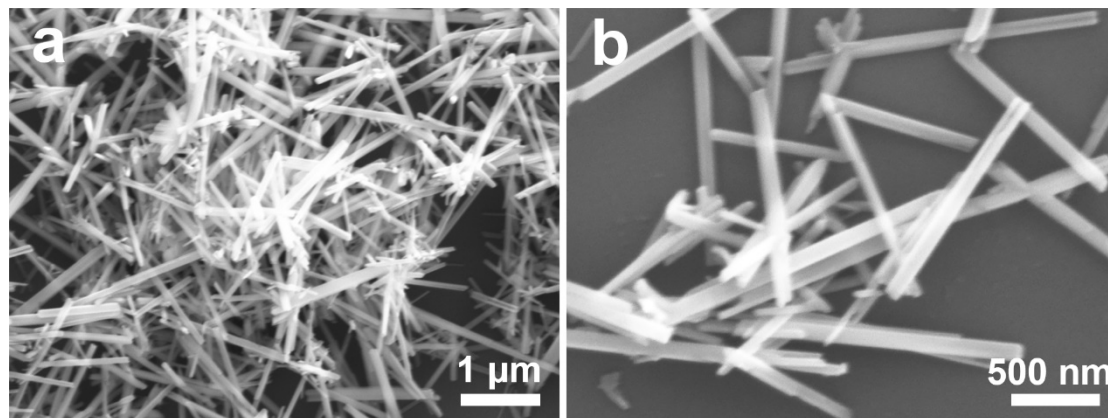

**Fig. S24** FESEM images of as-prepared  $\alpha$ -MnO<sub>2</sub> nanorods at (a) low and (b) high magnifications.

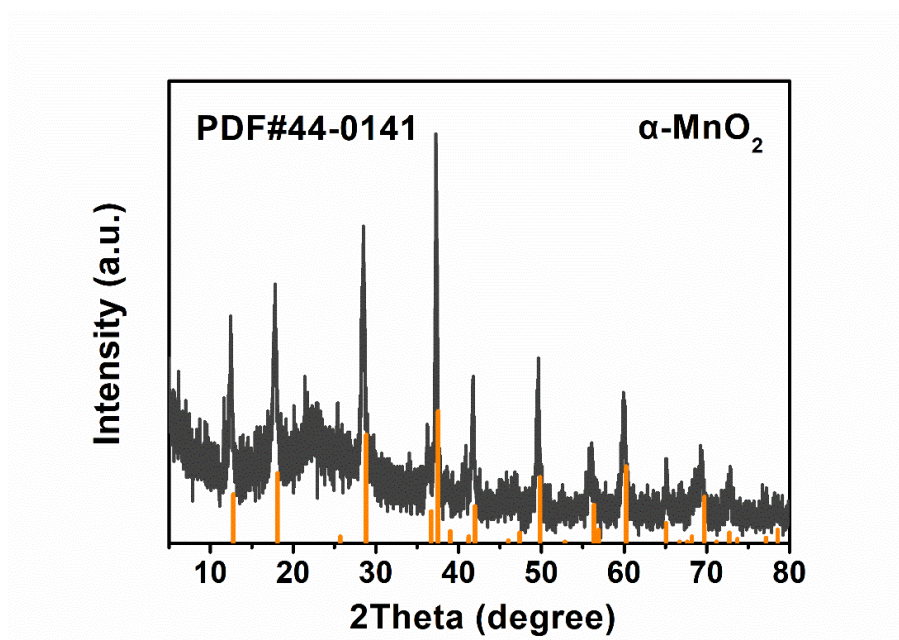

**Fig. S25** XRD pattern of the  $\alpha$ -MnO<sub>2</sub> nanorods.

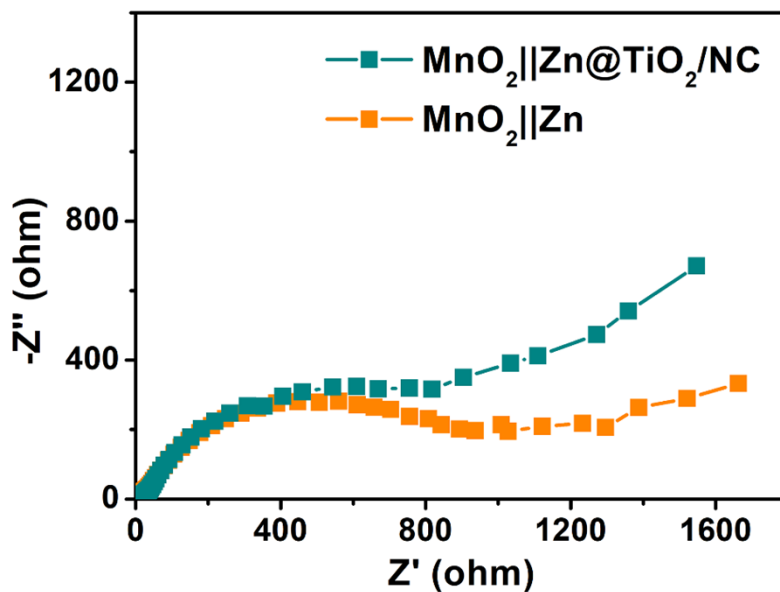

**Fig. S26** Nyquist plots of the MnO<sub>2</sub>-based full cells with bare Zn and Zn@TiO<sub>2</sub>/NC anodes, respectively.

**Table S1** The charge-transfer resistance ( $\Omega$ ) of the symmetrical cells with bare Zn and the Zn-TiO<sub>2</sub>@NC anode at various temperatures.

| Temperature (°C) | Zn ( $\Omega$ ) | Zn-TiO <sub>2</sub> @NC ( $\Omega$ ) |
|------------------|-----------------|--------------------------------------|
| 25               | 1380            | 171                                  |
| 40               | 692             | 130                                  |
| 50               | 455             | 108                                  |
| 60               | 313             | 94                                   |
| 70               | 198             | 81                                   |
| 80               | 149             | 69                                   |

**Table S2** Comparison of cycling performance for our work with recently reported anodes in symmetric cells.

| Electrode                             | Current density<br>(mA cm <sup>-2</sup> ) | Areal capacity<br>(mAh cm <sup>-2</sup> ) | Voltage hysteresis<br>(mV) | Life<br>(h) | Ref.        |
|---------------------------------------|-------------------------------------------|-------------------------------------------|----------------------------|-------------|-------------|
| 100TiO <sub>2</sub> @Zn               | 1                                         | 1                                         | 57.2                       | 150         | 41          |
| MOF-coated Zn                         | 3                                         | 0.5                                       | 80                         | 500         | 12          |
| MXene@Zn                              | 1                                         | 1                                         | 41.5                       | 300         | 42          |
| PAM-Zn                                | 2                                         | 4                                         | 46.5                       | 280         | 13          |
| MOF-based Zn                          | 1                                         | 1                                         | 20                         | 400         | 20          |
| Zn-Graphite                           | 0.1                                       | 0.1                                       | 28                         | 200         | 43          |
| ZnS@Zn                                | 2                                         | 2                                         | ≈50                        | 1100        | 25          |
| SEI-Zn                                | 5                                         | 1                                         | 50                         | 220         | 34          |
| Zn In                                 | 1                                         | 1                                         | ≈120                       | 510         | 27          |
| Zn@ZIF                                | 2                                         | 2                                         | 30                         | 700         | 22          |
| 100Al <sub>2</sub> O <sub>3</sub> @Zn | 1                                         | 1                                         | ≈50                        | 500         | 26          |
| 502 glue-coated Zn                    | 2                                         | 1                                         | ≈55                        | 400         | 28          |
| <b>Zn-TiO<sub>2</sub>@NC</b>          | <b>5</b>                                  | <b>1</b>                                  | <b>50</b>                  | <b>1100</b> | <b>This</b> |
|                                       | <b>2</b>                                  | <b>1</b>                                  | <b>20</b>                  | <b>750</b>  | <b>work</b> |

[S1] VandeVondele, J.; Hutter, J. Gaussian basis sets for accurate calculations on molecular systems in gas and condensed phases. *Comput. Phys. Commun.* **2007**, 127 (11), 114105.

[S2] Grimme, S. FESEMIempirical Gga-Type Density Functional Constructed with a Long-Range Dispersion Correction. *J. Comput. Chem.* **2006**, 27, 1787.

[S3] Perdew, J. P.; Burke, K.; Ernzerhof, M. Generalized Gradient Approximation Made Simple. *Phys. Rev. Lett.* **1996**, 77 (18), 3865-3868.



- [S4] Lippert, B. G.; Parrinello, J. H.; Michele, A hybrid Gaussian and plane wave density functional scheme. *Mol. Phys.* **1997**, 92 (3), 477-488.
- [S5] VandeVondele, J.; Hutter, J. Gaussian basis sets for accurate calculations on molecular systems in gas and condensed phases. *J. Chem, phys.* **2007**, 127 (11), 114105.
- [S6] Goedecker, S.; Teter, M.; Hutter, J. Separable dual-space Gaussian pseudopotentials. *Phys. Rev. B* **1996**, 54 (3), 1703-1710.
